# Supplementary material
Source: publisher site journal article supplement (https://www.spandidos-publications.com/8086/downloadSupplementary)
Supplement: Supplementary file 1 [file downloadSupplementary]

## Sheet: 附表18
Table SVIII. Validation of the nomogram integrating RiskScore, Age and Cancer Status for survival prediction.
Samples	Time	Status	RiskScore	Age	Cancer_Status
TCGA-3X-AAV9-01A	0.931507	1	3.25952	72	WITH TUMOR
TCGA-3X-AAVA-01A	1.22192	1	1.41938	50	WITH TUMOR
TCGA-3X-AAVB-01A	1.10411	0	2.86499	70
TCGA-3X-AAVC-01A	1.94521	0	1.0847	72	TUMOR FREE
TCGA-3X-AAVE-01A	1.78356	0	1.22483	60	TUMOR FREE
TCGA-4G-AAZO-01A	3.2274	0	0.714705	71	WITH TUMOR
TCGA-4G-AAZT-01A	1.15342	0	1.02623	62	TUMOR FREE
TCGA-W5-AA2G-01A	5.41644	0	1.55854	62	TUMOR FREE
TCGA-W5-AA2H-01A	2.95342	0	0.937006	70	TUMOR FREE
TCGA-W5-AA2I-01A	5.31507	1	0.523907	66	WITH TUMOR
TCGA-W5-AA2O-01A	1.75616	1	0.760421	57	WITH TUMOR
TCGA-W5-AA2Q-01A	0.139726	0	1.14461	68	TUMOR FREE
TCGA-W5-AA2T-01A	3.34521	1	1.3165	64	WITH TUMOR
TCGA-W5-AA2U-01A	1.72055	1	1.33769	78	WITH TUMOR
TCGA-W5-AA2W-01A	2.53425	1	1.28246	31	WITH TUMOR
TCGA-W5-AA2X-01A	0.745205	1	1.82536	67
TCGA-W5-AA2Z-01A	4.42466	0	1.60624	29	WITH TUMOR
TCGA-W5-AA30-01A	3.16164	0	1.33311	82	TUMOR FREE
TCGA-W5-AA31-01A	0.030137	0	1.73022	71	TUMOR FREE
TCGA-W5-AA33-01A	3.9726	0	1.20681	60	TUMOR FREE
TCGA-W5-AA34-01A	1.52329	1	0.946066	75	WITH TUMOR
TCGA-W5-AA36-01A	3.84384	1	1.19274	51	WITH TUMOR
TCGA-W5-AA38-01A	4.03288	0	0.572046	55	TUMOR FREE
TCGA-W5-AA39-01A	0.468493	1	0.70416	81	WITH TUMOR
TCGA-W6-AA0S-01A	2.21644	0	1.00589	46	TUMOR FREE
TCGA-WD-A7RX-01A	0.060274	1	0.961312	71	TUMOR FREE
TCGA-YR-A95A-01A	0.0739726	1	1.20453	52	WITH TUMOR
TCGA-ZD-A8I3-01A	0.465753	1	1.87923	73	TUMOR FREE
TCGA-ZH-A8Y1-01A	1.05753	1	1.61055	74	WITH TUMOR
TCGA-ZH-A8Y2-01A	1.92329	1	1.17118	59	WITH TUMOR
TCGA-ZH-A8Y4-01A	2.03288	1	1.72982	58	WITH TUMOR
TCGA-ZH-A8Y5-01A	3.36986	0	1.1519	69	WITH TUMOR
TCGA-ZH-A8Y6-01A	1.42466	0	1.40101	41	WITH TUMOR
TCGA-ZH-A8Y8-01A	1.65205	0	1.86574	73	TUMOR FREE
TCGA-ZU-A8S4-01A	0.271233	1	3.198	52	WITH TUMOR
